# Supplementary material for: Enrichment of Exosome-Like Extracellular Vesicles from Plasma Suitable for Clinical Vesicular miRNA Biomarker Research
Source: J Clin Med. 2019 Nov 15;8(11):1995. doi: 10.3390/jcm8111995 (PMC6912341; doi:10.3390/jcm8111995)
Supplement: Supplementary file 1 [file jcm-08-01995-s001.pdf]

## Supplementary Materials

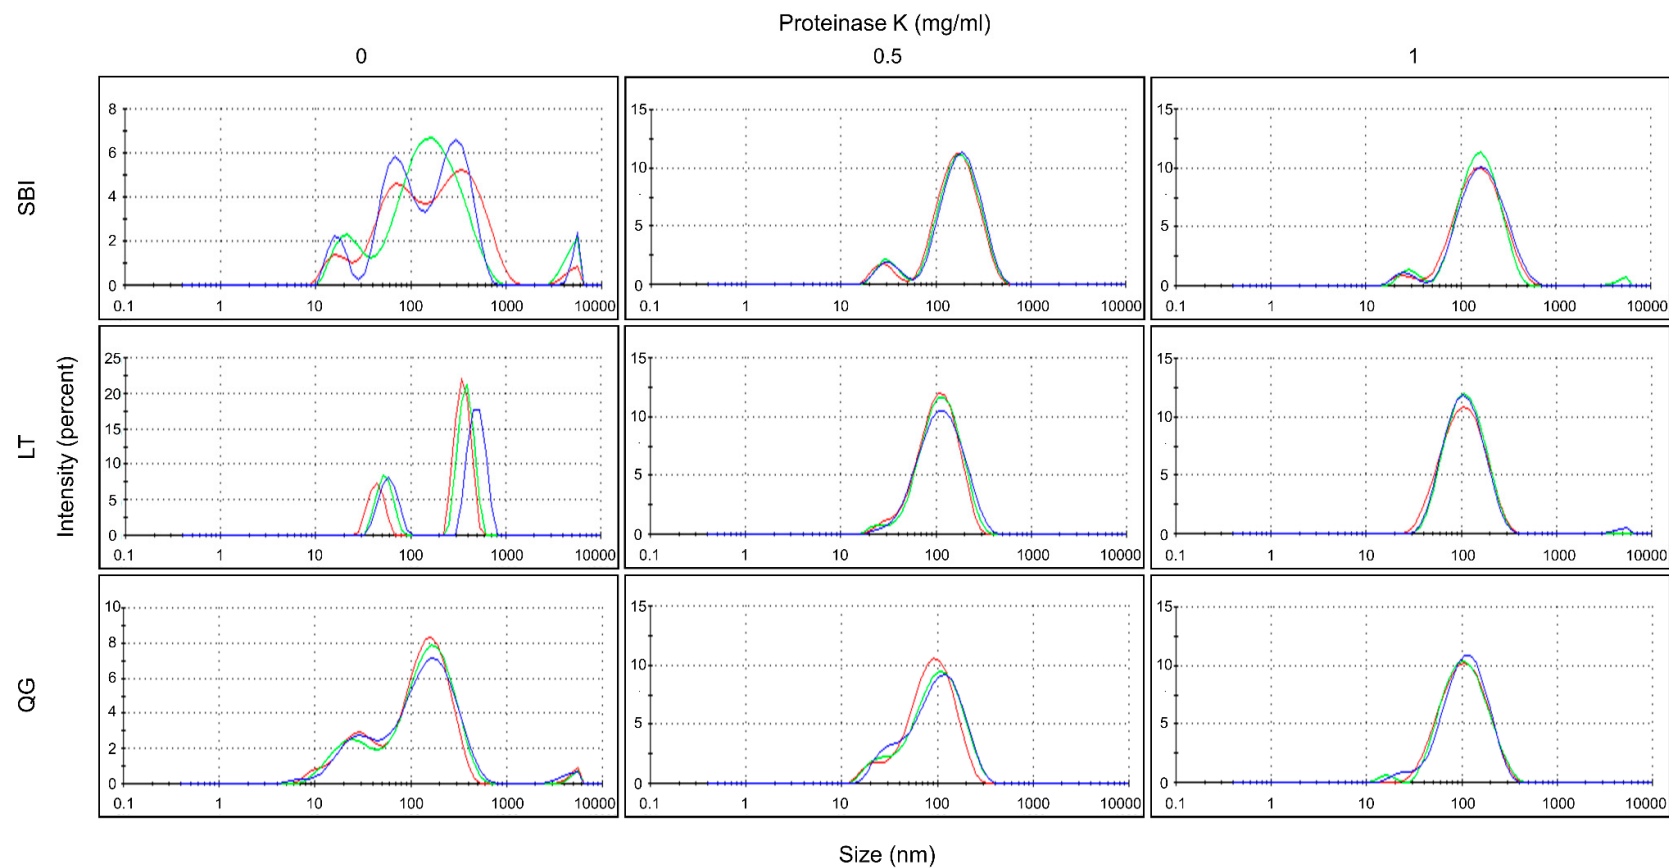

**Supplementary Figure S1.** Size distribution analysis using the Dynamic Light Scattering (DLS). Using the QG kit, size of isolated ELVs with or without proteinase K (PK) treatment was measured by DLS analysis. Without PK treatment, multiple peaks of intensity were observed, however, PK treatment prior to precipitation increased the homogeneity of the size of vesicles in all 3 kits.

**Supplementary Table S1.** Demographic information and clinical diagnosis of volunteers who provided plasma samples for miRNA analyses.

| Sample | Age | Gender | Level of Education (years) | Diagnosis                 | Amyloid PET |
|--------|-----|--------|----------------------------|---------------------------|-------------|
| NL1    | 58  | F      | 12                         | Normal cognitive function | Negative    |
| NL2    | 68  | F      | 12                         | Normal cognitive function | Negative    |
| NL3    | 67  | F      | 0.5                        | Normal cognitive function | Negative    |
| AD1    | 85  | F      | 6                          | Alzheimer's dementia      | Positive    |
| AD2    | 76  | F      | 9                          | Alzheimer's dementia      | Positive    |
| AD3    | 85  | F      | 0.5                        | Alzheimer's dementia      | Positive    |
